# Supplementary figures and images for: Template controlled synthesis of monometallic zerovalent metal nanoclusters inside cross-linked polymer frameworks: the effect of a single matrix on the size of different metal nanoparticles
Source: Royal Society of Chemistry journal article supplement (doi:10.1039/b9nj00648f), 2010-01-01

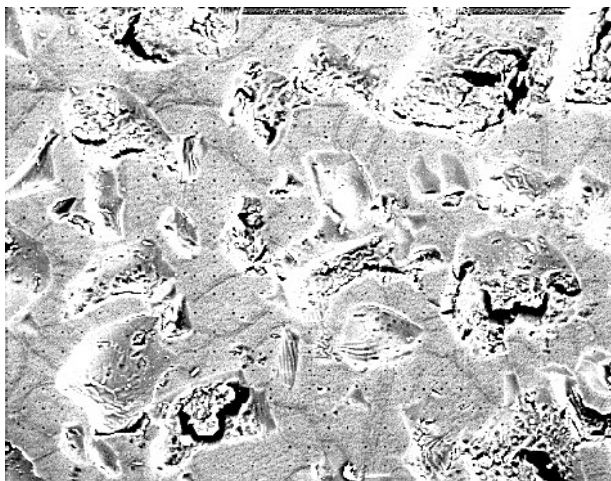

a)

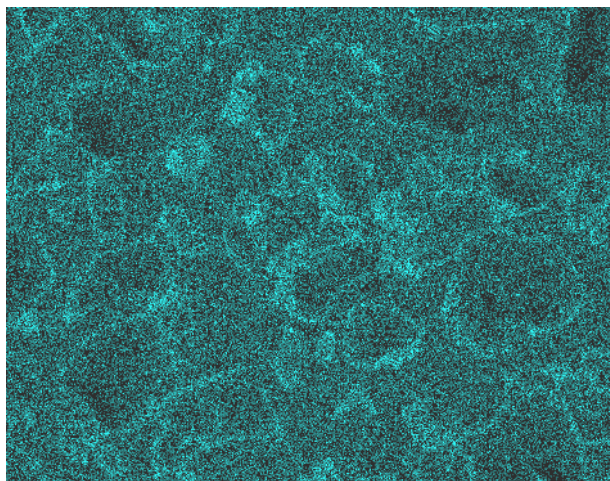

g)

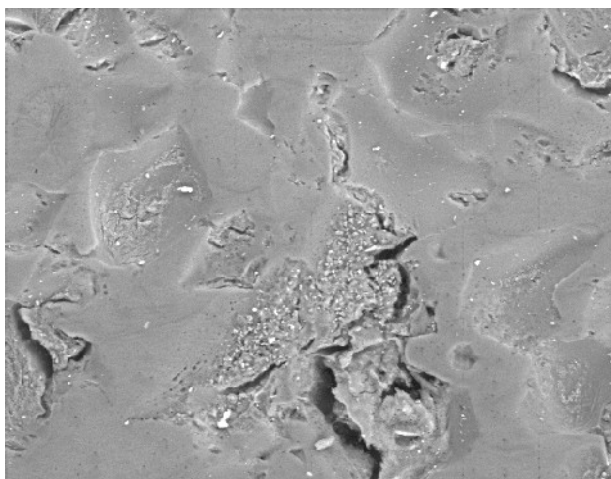

b)

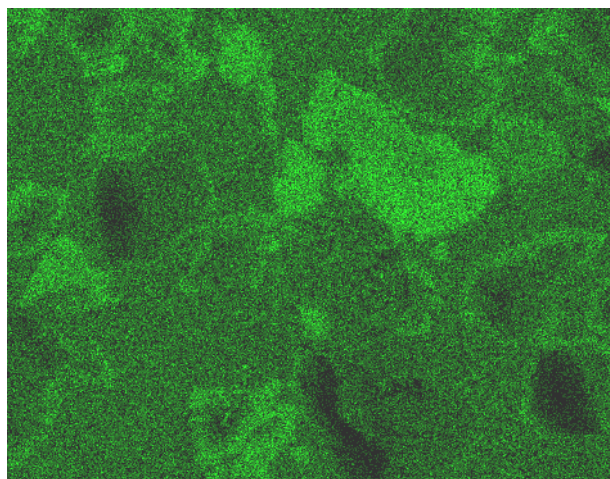

h)

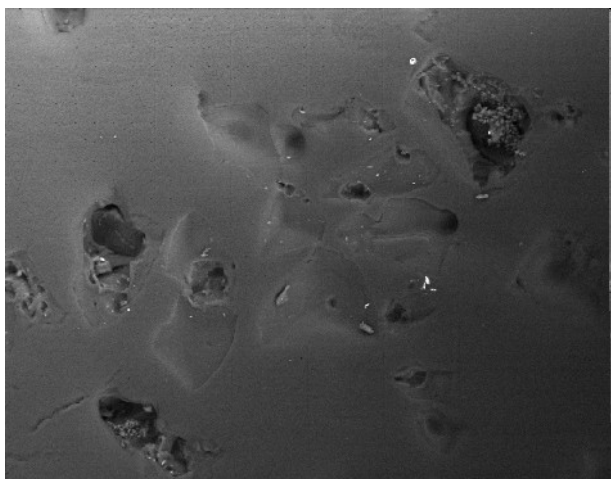

c)

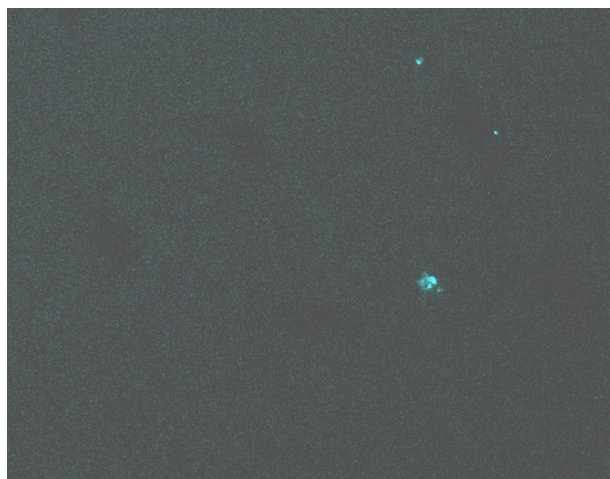

i)



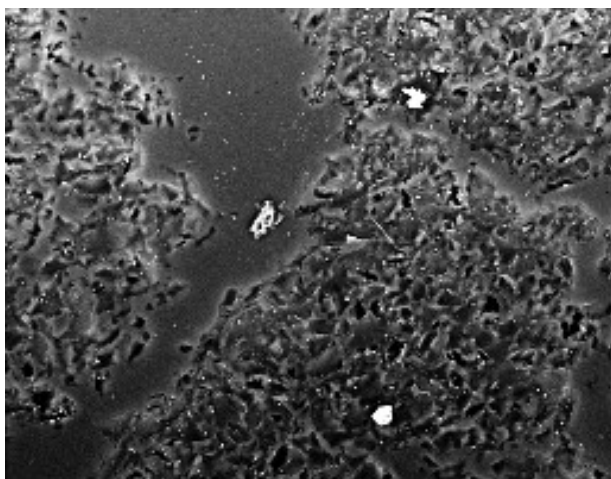

d)

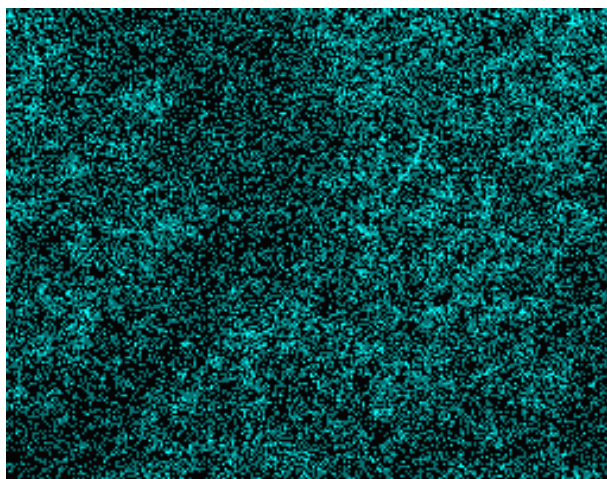

j)

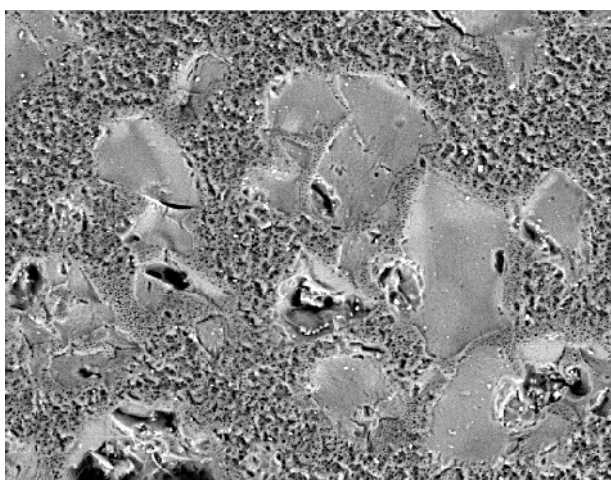

e)

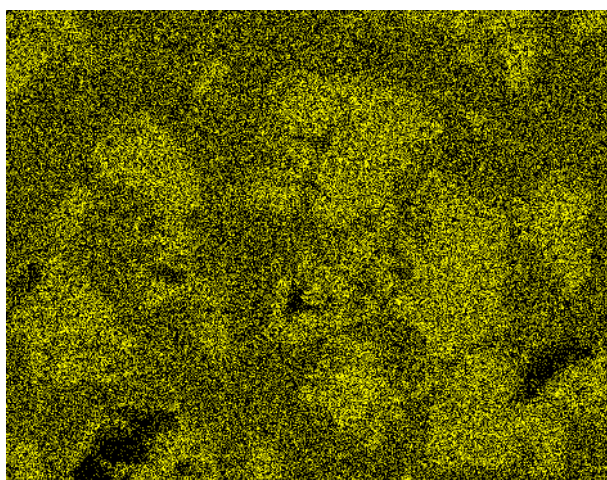

k)

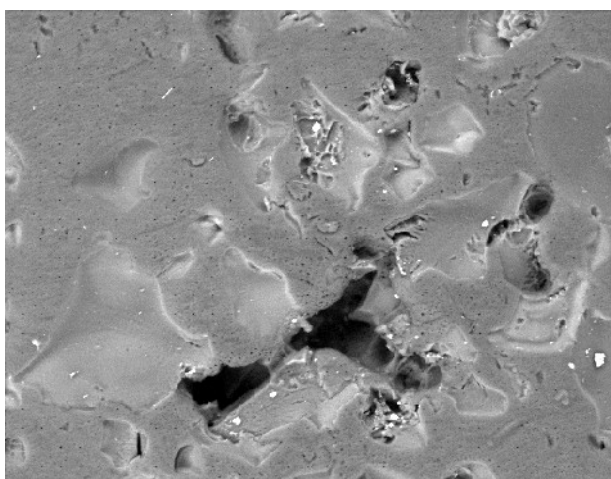

f)

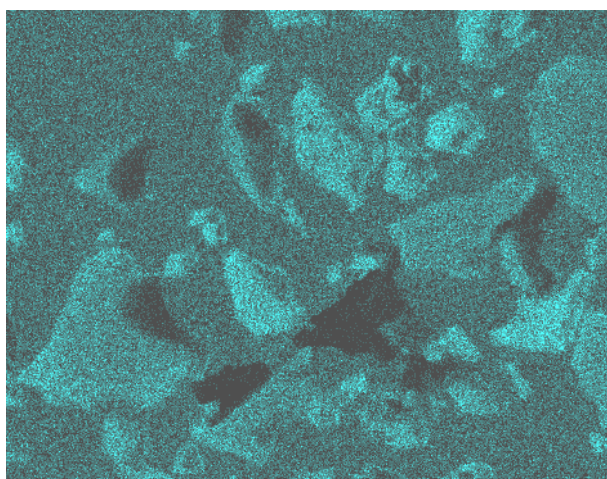

l)

SEM (a-f) and EDX (g-l) images for M/DV44 (a, g: Ru; b, h: Rh; c, i: Ag; d, j: Pd; e, k: Pt; f, l: Au)

Supplement: b9nj00648f.pdf [file b9nj00648f.pdf]
